# 1 Adaptive divergence in shoot gravitropism creates hybrid 2 sterility in an Australian wildflower

3 Melanie J. Wilkinson<sup>1\*†</sup>, Federico Roda<sup>1,2†</sup>, Greg M. Walter<sup>1,3</sup>, Maddie E. James<sup>1</sup>, Rick Nipper<sup>4</sup>,  
4 Jessica Walsh<sup>4</sup>, Scott L. Allen<sup>1</sup>, Henry L. North<sup>1,5</sup>, Christine A. Beveridge<sup>1</sup> and Daniel Ortiz-  
5 Barrientos<sup>1</sup>.

6 <sup>1</sup>The University of Queensland, School of Biological Sciences, St Lucia QLD 4072, Australia.

7 <sup>2</sup>Current address: Universidad Nacional de Colombia, Departamento de Biología, Bogotá,  
8 Colombia. <sup>3</sup>Current address: Monash University, School of Biological Sciences, Clayton Vic  
9 3800. <sup>4</sup>Floragenex, Inc., 4640 SW Macadam Avenue, Suite 200F, Portland, OR 97239, USA.

10 <sup>5</sup>Current address: University of Cambridge, Department of Zoology, Downing St., Cambridge  
11 CB2 3EJ, UK.

12 \*Melanie J. Wilkinson

13 Email: [m.wilkinson2@uq.edu.au](mailto:m.wilkinson2@uq.edu.au)

14 †These authors contributed equally to the paper.

15 **Keywords:** Local adaptation, intrinsic reproductive isolation, hybrid sterility, speciation, natural  
16 selection

17

## 18 Abstract

19 Natural selection is a significant driver of speciation. Yet it remains largely unknown whether  
20 local adaptation can drive speciation through the evolution of hybrid sterility between  
21 populations. Here, we show that adaptive divergence in shoot gravitropism, the ability of a  
22 plant's shoot to bend upwards in response to the downward pull of gravity, contributes to the  
23 evolution of hybrid sterility in an Australian wildflower, *Senecio lautus*. We find that shoot  
24 gravitropism has evolved multiple times in association with plant height between adjacent  
25 populations inhabiting contrasting environments, suggesting that these traits have evolved by  
26 natural selection. We directly tested this prediction using a hybrid population subjected to eight  
27 rounds of recombination and three rounds of selection in the field. It revealed that shoot  
28 gravitropism responds to natural selection in the expected direction of the locally adapted  
29 population. This provided an ideal platform to test whether genetic differences in gravitropism  
30 contribute to hybrid sterility in *S. lautus*. Using this advanced hybrid population, we discovered  
31 that crossing individuals with extreme differences in gravitropism reduce their ability to produce  
32 seed by 21%, providing strong evidence that this adaptive trait is genetically correlated with  
33 hybrid sterility. Our results suggest that natural selection can drive the evolution of locally  
34 adaptive traits that also create hybrid sterility, thus indicating an evolutionary connection  
35 between local adaptation and the origin of new species.

## 36 Significance statement

37 New species originate as populations become reproductively isolated from one another.  
38 Despite recent progress in uncovering the genetic basis of reproductive isolation, it remains  
39 unclear whether intrinsic reproductive barriers, such as hybrid sterility, evolve as a by-product  
40 of local adaptation to contrasting environments or evolve through non-ecological processes,  
41 such as meiotic drive. Here, we show that differences in a plant's response to the pull of gravity  
42 have repeatedly evolved amongst coastal populations of an Australian wildflower, thus  
43 implicating a role of natural selection in their evolution. We found a strong genetic correlation  
44 between variation in this adaptive trait and hybrid sterility, suggesting that intrinsic reproductive  
45 barriers contribute to the origin of new species as populations adapt to heterogeneous  
46 environments.

47

48 **Main text**

49

50 **Introduction**

51 Ever since Darwin's work on the origin of species by natural selection (1), researchers have  
52 sought to understand how natural selection creates reproductive barriers between populations  
53 (2). On one hand, many studies have established that adaptation to contrasting environments  
54 often reduces migrant and hybrid fitness in the wild, a process commonly known as extrinsic  
55 reproductive isolation (3). These extrinsic barriers to reproduction can dramatically reduce gene  
56 flow between populations (4, 5); however, they only act in the local environment of populations  
57 and are therefore susceptible to changes in environmental conditions. Consequently, it is  
58 unclear whether the evolution of extrinsic reproductive isolation alone can complete speciation  
59 (4). On the other hand, intrinsic reproductive barriers such as hybrid sterility or inviability can  
60 accumulate regardless of environmental change (6) and therefore are expected to be more  
61 stable over time and contribute more reliably to the completion of speciation (2). One way in  
62 which natural selection can simultaneously create both extrinsic and intrinsic reproductive  
63 isolation is when the beneficial mutations that drive local adaptation in each population also fail  
64 to interact properly between populations through negative epistasis (7) (i.e., Dobzhansky-Muller  
65 genetic incompatibilities). However, given the paucity of examples that directly link loci that  
66 contribute to both local adaptation and intrinsic reproductive isolation, we remain ignorant as to  
67 whether natural selection drives speciation through the concomitant evolution of extrinsic and  
68 intrinsic barriers between populations (8).

69 Two notable examples genetically link local adaptation and intrinsic reproductive isolation, one  
70 via pleiotropy and the other via tight genetic linkage. Selection for pathogen resistance genes  
71 in *Arabidopsis thaliana* results in a pleiotropic effect of hybrid necrosis, which dramatically  
72 lowers reproductive success (9). In contrast, the tight genetic linkage between alleles selected  
73 for copper tolerance and alleles that cause hybrid mortality in *Mimulus guttatus* led to  
74 divergence between populations growing next to copper mines and those occupying typical  
75 *Mimulus* habitats (10). Although plant-pathogen coevolution and tight linkage between genes  
76 performing various functions (e.g., stress tolerance and seed development) is a powerful  
77 example of a genetic mechanism that could often drive species divergence (11), we need more  
78 genetic and ecological studies to further understand when natural selection drives the  
79 correlated evolution of local adaptation and intrinsic reproductive isolation (12). So far, most  
80 results on the genetics of intrinsic reproductive isolation suggest that several mechanisms are  
81 driving the evolution of hybrid sterility across taxa (see Presgraves (13) for a review), such as  
82 genetic conflict (e.g., the evolution of distorter genes and their suppressors) (14), and parental  
83 conflict (e.g., endosperm failure in plants) (15). However, it remains unclear whether or not the  
84 local environment has a key role in creating intrinsic reproductive isolation (see Fishman and  
85 Sweigart (16) for a review of the mechanisms), thus limiting our understanding of the  
86 mechanisms creating genetic correlations between local adaptation and intrinsic reproductive  
87 isolation.

88 Here, we introduce a novel system of study where we take advantage of the repeated evolution  
89 of divergent growth habits to study the contribution of local adaptation to the evolution of  
90 intrinsic reproductive barriers in an Australian wildflower, *Senecio lautus* (G. Forst. ex Willd.)  
91 (17, 18). Adjacent populations exhibit erect or prostrate growth habits dependent on whether  
92 they inhabit the sand dune or rocky headlands, respectively. Previous population genetic  
93 studies in *S. lautus* found that different sets of genes related by similar functions were  
94 repeatedly differentiated between populations with these two contrasting growth habits (19, 20).  
95 One of these sets contained genes belonging to the auxin pathway, where genes related to the  
96 transport and regulation of this key plant hormone had repeatedly diverged between erect and  
97 prostrate populations. In many plants, auxin genes are also involved in creating variation in  
98 height (21, 22), branching (23, 24) and reproduction (e.g. pollen tube growth (25)). Given the  
99 observed divergence in height and branching, with little gene flow between erect and prostrate  
100 populations of *S. lautus* (26, 27), the evolution of auxin-related genes may explain the presence  
101 of both adaptation and reproductive isolation in *S. lautus*. Studies across the plant kingdom  
102 have established that the auxin hormone has a conserved function in governing the way in  
103 which plants orient themselves to light and gravity cues (28). For example, mutant surveys in  
104 *Arabidopsis* revealed that many auxin-related genes (with functions influencing the

105 biosynthesis, transport or signaling of the auxin hormone) were required for shoot gravitropism  
106 - directional growth response of the shoot against the pull of gravity (23, 28-30). With this in  
107 mind, we reasoned that if divergence in auxin-related genes contributed to the evolution of local  
108 adaptation, shoot gravitropism would be divergent between adjacent erect and prostrate  
109 populations and would differentially respond to natural selection within their local environments.  
110 Finally, if local adaptation were driving the evolution of intrinsic reproductive isolation in *S.*  
111 *lautus*, crosses between hybrid individuals with extreme differences in an adaptive trait would  
112 be genetically incompatible and not produce seed.

113 We tested these three predictions on seven coastal population pairs of *S. lautus* (Fig. 1a, Fig.  
114 S1 and Table S1), where there is strong evidence of local adaptation between adjacent Dune  
115 and Headland populations (31-34). Populations inhabiting sand dunes (Dune hereafter) are  
116 usually erect, while populations growing on adjacent rocky headlands (Headland hereafter) are  
117 usually prostrate (Fig. 1b). Erect and prostrate growth habits can also be found in related  
118 populations from the alpine regions of Australia, with a prostrate population inhabiting an  
119 exposed alpine meadow and an erect population inhabiting a sheltered alpine gully (Fig. 1c).  
120 Dune populations are continually exposed to high temperatures, high solar radiation, low  
121 salinity, and low nutrient sand substrate, whereas Headland populations are exposed to high  
122 salinity, high nutrients, and powerful winds (32). These Dune and Headland ecotypes are  
123 genetically grouped into two major monophyletic clades based on geography (eastern and  
124 south-eastern Australia), and adjacent Dune and Headland populations are often sister taxa,  
125 suggesting that they have evolved their contrasting growth habits independently multiple times  
126 (17, 27, 31, 35).

127 The two ecotypes also show variable levels of intrinsic reproductive isolation, where hybrid  
128 sterility in F1 Dune-Headland hybrids is generally weak. For example, there is <15% crossing  
129 failure at Lennox Head (31, 32) and <9% at Cabarita Beach (31). In contrast, hybrid sterility  
130 was found to be strong in F2 Dune-Headland hybrids from Lennox Head and an F2 generation  
131 created from four ecotypes (58% crossing failure (32, 36)). Genetic incompatibilities appear to  
132 largely be removed in the F2 generation as F3 hybrids are fertile (32, 36). Therefore, the inability  
133 to produce seed in F2's is likely due to a small number of strong recessive negative epistatic  
134 interactions between these ecotypes (37, 38). Furthermore, demographic analyses recently  
135 revealed minimal gene flow levels between adjacent Dune and Headland populations (27),  
136 indicating that reproductive barriers (intrinsic or extrinsic) have prevented hybridization from  
137 occurring in the field. The presence of reproductive isolation between multiple locally adapted  
138 erect and prostrate populations of *S. lautus* provides an excellent opportunity to understand  
139 whether local adaptation driven by morphological and physiological traits can lead to the  
140 accumulation of intrinsic reproductive barriers.

## 141 **Results**

### 142 **Divergence in gravitropic response is auxin dependent in *Senecio lautus***

143 To test the hypothesis that auxin-related genes drove the evolution of gravitropic differences  
144 between erect and prostrate *S. lautus* populations, we directly examined whether synthetic  
145 auxin and auxin transport inhibitors influence gravitropism differently between the ecotypes of  
146 a population pair. We grew Dune (n=90) and Headland (n=98) seeds collected from Lennox  
147 Head with synthetic auxin 2,4-D (2,4-Dichlorophenoxyacetic acid), and polar auxin transport  
148 inhibitor NPA (naphthylphthalamic acid) (39, 40). Because a gravitropic response requires an  
149 auxin concentration gradient, we reasoned that removing the gradient would reduce the  
150 gravitropic angle in Dune individuals (Fig. S2). As expected, the addition of synthetic auxin  
151 2,4-D reduced the gravitropic angle more in Dune individuals than in Headland individuals  
152 (LR chi-square=18.49, P<0.0001). Similarly, the addition of auxin transport inhibitor NPA  
153 reduced the gravitropic angle in our experiments more in Dune individuals than in Headland  
154 individuals (LR chi-square=21.18, P<0.0001). This difference in hormone response between  
155 Dune and Headland individuals from Lennox Head, gives credence to our hypothesis that  
156 different gravitropic responses between erect and prostrate individuals reflect divergence in  
157 auxin-related genes.

## 158 **Repeated height and gravitropism divergence across *Senecio lautus* populations**

159 To understand whether auxin-related genes might have repeatedly diverged with growth habit  
160 in *S. lautus*, we tested whether plant height (a simple growth habit trait) predicts shoot  
161 gravitropism in 16 *S. lautus* natural populations (Fig. 1a, Fig. S1 and Table S1). We measured  
162 the change in angle of a seedling's shoot 24 hours after a 90° rotation (29, 41), where 0° is lack  
163 of a gravitropic response whereas 90° describes a complete re-orientation of the shoot and a  
164 large gravitropic response. We expected that short populations would have a smaller gravitropic  
165 angle than their adjacent tall population after rotation, if these traits were correlated. Across  
166 these populations, the average height of a population predicted its average gravitropic angle  
167 (Fig. 2a;  $F_{1,13}=17.65$ ,  $P=0.0010$ ), with the average magnitude of gravitropism differing across  
168 the two monophyletic clades of this system ( $F_{1,13}=32.58$ ,  $P<0.0001$ ). In addition, we found that  
169 plant height in natural environments (field) strongly correlates with estimates of plant height in  
170 common garden conditions (glasshouse) ( $F_{1,9}=12.41$ ,  $P=0.0065$ ), indicating that differences in  
171 plant height are genetic and do not arise from plastic responses to the environment. Therefore,  
172 changes in gravitropism appear to be biologically correlated with divergent growth habit traits  
173 such as plant height, and this relationship has evolved independently in each clade.

174 We then investigated which of the seven adjacent Dune and Headland (and Alpine) population  
175 pairs drove the observed pattern. Four population pairs showed the expected correlation, where  
176 plants from the Headland population exhibited a smaller gravitropic angle and were shorter  
177 than plants from their adjacent Dune population (Fig. 2b, c). The expected pattern was also  
178 observed in divergent populations from the alpine region of Australia, where the exposed Alpine  
179 population in the meadow was shorter and had a smaller gravitropic angle than the population  
180 in the sheltered alpine gully (Fig. 2c). In the population pair at Millicent, plant height and  
181 gravitropism did not differ between Dune and Headland population pairs (Fig. 2c), possibly due  
182 to their similarity in environmental variables (35). At Stradbroke Island, we observed a  
183 difference in height in the expected direction but not gravitropism (Fig. 2b) and at Point Labatt,  
184 we observed a difference in gravitropism in the expected direction but not height (Fig. 2c),  
185 indicating that height and gravitropism are not always genetically correlated and alternate  
186 genes or pathways might be utilized (e.g., gibberellin controls dwarfism in some plants (42,  
187 43)). Overall, these results are consistent with divergence in auxin-related genes evolving in  
188 parallel in coastal and alpine ecotypes in this system.

## 189 **Local adaptation drives the evolution of height and gravitropism**

190 To directly assess the role of natural selection on the evolution of height and gravitropism, we  
191 conducted two independent sets of field adaptation experiments. In each field experiment,  
192 Dune and Headland parental and hybrid seeds were transplanted into replicated blocks at the  
193 sand dune and rocky headland at Lennox Head. In all field experiments, natural selection  
194 consistently favored the local Dune or Headland population over the foreign population (Fig. 3),  
195 indicating that our experiment was exposed to the positive selection that drove local adaptation  
196 in each environment.

197 First, we tested whether differences in height could drive differences in fitness in the rocky  
198 headlands. We hypothesized that if natural selection was driving the evolution of height,  
199 offspring produced by short hybrid parents would live longer than offspring produced by tall  
200 hybrid parents in the rocky headland. We focused on prostrate growth because it is likely the  
201 derived trait, given that the majority of *S. lautus* populations have an erect growth habit (19,  
202 32). Our goal was to introgress Dune alleles associated with height onto a Headland genomic  
203 background to examine their effect on fitness in the headland environment. Briefly, we crossed  
204 Dune and Headland seeds from Lennox Head and then completed two rounds of backcrossing  
205 followed by one round of crossing between the tallest 10% and the shortest 10% (Table S2 and  
206 Fig. S3). We transplanted 558 of these seeds (from 28 families) into the rocky headland. As  
207 predicted, shorter hybrid parents produced offspring that lived longer in the rocky headland  
208 relative to offspring from taller hybrid parents ( $F_{1,26,23}=4.87$ ,  $P=0.0362$ ). These results suggest  
209 that traits genetically correlated with plant height contributed to variation in early developmental  
210 fitness in the rocky headlands and contributed directly or indirectly to the evolution of divergent  
211 growth habit.



212 Next, we tested whether rapid adaptation to contrasting environments can lead to the evolution  
213 of gravitropic responses in the direction of the local population. We hypothesized that if natural  
214 selection was driving the evolution of shoot gravitropism, exposing an advanced recombinant  
215 population to multiple rounds of viability selection in the field would create genetic covariation  
216 between fitness and gravitropism. We crossed 23 Dune and 22 Headland individuals from  
217 Lennox Head to test this hypothesis and then maintained three independent genetic lines for  
218 eight generations (Table S3). This process disassembled allelic combinations and constructed  
219 an F8 recombinant hybrid population (26) (Fig. 4a). We planted 2,403 of these F8 seeds (from  
220 89 families) into both the sand dune and rocky headland (Fig. 4b and Table S4) and conducted  
221 family-based truncation selection for three generations. The fittest families in each environment  
222 were selected based on the highest germination and survival (top 50%; see Methods for  
223 selection details). Siblings from these families were crossed (within a genetic line) to produce  
224 the next generation. In the F10 generation, we tested whether families with the largest number  
225 of survivors also produced offspring (F11) with the local gravitropic response under controlled  
226 conditions.

227 In agreement with our prediction, F10 families with the largest number of survivors in the sand  
228 dune produced F11 offspring with a higher gravitropic angle (Table 1). We discovered that this  
229 relationship between fitness and gravitropism was driven by the fitness of the F10 dam family  
230 and not the F10 sire family (Table 1), suggesting maternal genetic effects might contribute to  
231 the evolution of gravitropism in the sand dunes. In contrast, we did not detect an association  
232 between the fitness of the F10 families and gravitropism of their offspring when we performed  
233 the experiment on the rocky headland. Instead, Headland survivors had a positive association  
234 between the number of days until death in a controlled environment (intrinsic viability) and  
235 gravitropism (Table 1), where individuals that died early in development had a smaller  
236 gravitropic angle (agravitropic). We are left with the conjecture that there could be intrinsic  
237 fitness costs for agravitropic alleles on a hybrid genomic background.

238 We then tested whether adaptation to contrasting environments can recreate trait correlations  
239 observed in nature. As we have shown, there is a strong correlation between gravitropism and  
240 height across many (but not all) natural populations of *S. laetus*. We expect to lose this trait  
241 correlation in creating the hybrid population if different genes control the traits. If natural  
242 selection for these traits were strong, we could reconstruct the correlation after several rounds  
243 of selection in the coastal environments of the Dune and Headland populations. There was no  
244 genetic correlation between height and gravitropism in the control population grown only in the  
245 glasshouse ( $F_{1,114.3}=0.08$ ,  $P=0.7801$ ,  $r^2=0.04$ ) indicating genes contributing to these traits are  
246 different and not pleiotropic. As predicted, the genetic correlation between height and  
247 gravitropism was strong after three rounds of selection in the rocky headland ( $F_{1,169.5}=7.09$ ,  
248  $P=0.0085$ ,  $r^2=0.27$ ) and weak after selection in the sand dune ( $F_{1,151.3}=3.20$ ,  $P=0.0756$ ,  
249  $r^2=0.09$ ). Together, these results indicate that natural selection can act on standing genetic  
250 variation and reconstitute genetic architectures favored in these coastal environments.

## 251 **The genetics underlying gravitropism in *Senecio laetus***

252 To better understand the genes underlying shoot gravitropism in *S. laetus*, we performed  
253 selective genotyping on the tails of the gravitropic distribution of the F11 hybrid populations  
254 (Fig. 4c; Dune survivors, Headland survivors and Control). We identified candidate gene  
255 regions containing the most extreme allelic differences between individuals with the smallest  
256 gravitropic angle (agravitropic tail,  $<20^\circ$ ; mean of tail =  $6.46 \pm 1.10^\circ$ ,  $n=68$ ) and the largest  
257 gravitropic angle (gravitropic tail,  $>56^\circ$ ; mean of tail =  $62.03 \pm 0.45^\circ$ ,  $n=77$ ). We found 55 sites  
258 (0.2% of all SNPs) across 49 genomic contigs (Data S1) with an allelic difference in the  
259 99.8% quantile ( $0.15 < p < 0.22$ ), indicating a polygenic basis for the phenotype. We discovered  
260 that these candidate gene regions disproportionately contained homologous genes with  
261 predicted gene ontology categories of transport and localization of molecules within and  
262 between cells (Table S5). This is consistent with expectations, as redistribution of auxin is  
263 required for a gravitropic response (28). Five of the 55 sites (11%) are located in gene  
264 homologs with functions related to the auxin pathway, including the second (*ENODL1*; early  
265 nodulin-like protein 1) (44, 45) and fourth (*ABA3*; molybdenum cofactor sulfurase) (46) most  
266 differentiated SNPs between the agravitropic and gravitropic F11 tails. *Arabidopsis wat1*  
267 mutants, an ortholog of *ENODL1*, are deficient in auxin production, display reduced auxin

268 basipetal transport and have downregulated expression of many auxin-related genes,  
269 including those involved in response to auxin, auxin biosynthesis and transport (44, 45).  
270 *ABA3*, also named *LOS5* and *SIR3*, encodes a molybdenum cofactor sulfurase essential for  
271 the activity of several enzymes including for the plant hormone ABA and the auxinic  
272 compound sirtinol (47, 48). Genetic loss of function of *ABA3* causes impaired auxin signaling  
273 as well as reduced ABA levels (46).

274 Auxin-related genes, *ENODL1* and *ABA3*, have likely contributed to the adaptive and polygenic  
275 divergence of gravitropism in *S. laetus*. In both the *ENODL1* and *ABA3* genes, natural selection  
276 recreated the expected allelic frequency shift in the F11 tails towards the parent with the same  
277 trait (Data S1). For instance, the alleles favored in the agravitropic F11 tail were at high  
278 frequencies in the Headland natural population (*ENODL1* cytosine allele (C)=0.87 and *ABA3*  
279 guanine allele (G)=0.89), with the alternate alleles favored in the gravitropic F11 tail and the  
280 Dune natural population (*ENODL1* adenine allele (A)=0.69 and *ABA3* A=0.97). *ENODL1* and  
281 *ABA3* were in strong linkage disequilibrium in the survivors of the gravitropism adaptation  
282 experiment in the rocky headland (Fisher's exact test, n=57, P=0.0008) and sand dune  
283 (Fisher's exact test, n=37, P=0.4093), suggesting natural selection has likely reconstituted this  
284 favorable allelic combination. Individuals with a *ENODL1* C/C and *ABA3* G/G genotype were  
285 associated with a reduction in gravitropism of 25° relative to all other genotype combinations  
286 (Fig. 5;  $t_{34,30}=4.86$ , P<0.0001), indicating that not sensing the pull of gravity, or reacting to it, is  
287 a recessive trait. *ENODL1* and *ABA3* have gene homologs with functions in not only  
288 gravitropism and plant height but also in salt tolerance and pollen tube reception (44, 46, 49-  
289 53), suggesting that auxin-related genes could not only contribute to the adaptive evolution of  
290 gravitropism but also the evolution of reproductive trait differences between Dune and  
291 Headland populations that could affect seed production. Overall, our results suggest that  
292 divergence in auxin-regulated molecular processes contributed to the evolution of local  
293 adaptation to contrasting environments in coastal populations of *S. laetus*.  
294

## 295 **The consequences of gravitropism divergence for the evolution of hybrid sterility**

296 To investigate whether divergence in auxin-related genes has consequences for reproductive  
297 compatibility between Dune and Headland populations, we measured crossing success  
298 between agravitropic and gravitropic F11 hybrids. Such crosses directly test whether a genetic  
299 correlation exists between gravitropism and hybrid sterility, and therefore evaluating the  
300 hypothesis that intrinsic reproductive isolation can evolve as a by-product of adaptation to local  
301 conditions. We therefore expected to observe increased hybrid sterility between F11  
302 agravitropic and gravitropic individuals, and reproductive compatibility between individuals with  
303 similar gravitropism values. Hybrid sterility was defined as fewer than three seeds produced  
304 per flower head with at least three mating attempts for reciprocal crosses (fertile plants produce  
305 at least 30 seeds per cross per flower). We performed 28 crosses in families with an agravitropic  
306 response (within agravitropic tail, Fig. 4), 37 crosses in families with a gravitropic response  
307 (within gravitropic tail), and 67 crosses between these agravitropic and gravitropic families  
308 (between tails). Consistent with a genetic correlation between gravitropism and intrinsic  
309 reproductive isolation in *S. laetus*, we found that hybrid sterility was more common (Odd's  
310 ratio=4.8x, P=0.0188) in crosses between F11 agravitropic and gravitropic plants (21%) than  
311 within each of these tails (5%; LR chi-square=6.86, P=0.0088). This pattern of crossing failures  
312 indicates that gravitropism alleles have linked or pleiotropic effects on hybrid sterility in *S.*  
313 *laetus*.

314 To assess what might be driving this association between gravitropism and hybrid sterility, we  
315 examined whether genetic line, F11 population, or specific individuals were correlated with  
316 hybrid sterility. Crosses within (n=77) and between (n=55) the three genetic lines, regardless  
317 of their gravitropic response, did not affect hybrid sterility (LR chi-square=1.10, P=0.2937). This  
318 result indicates that the hybrid sterility found in the F11's is unlikely to be from genetic drift  
319 leading to incompatible differences between the genetic lines. Crosses within (n=80) and  
320 between (n=52) the three F11 populations (Dune survivors, Headland survivors and Control)  
321 did not affect hybrid sterility in agravitropic and gravitropic individuals (LR chi-square=0.15,  
322 P=0.6995), increasing the likelihood that gravitropism, and not another trait responding to  
323 selection in one of these environments, causes intrinsic reproductive isolation in these

324 populations. Next, we determined whether specific F11 individuals (n=129) drove this  
325 association between gravitropism and hybrid sterility. Thirty-two individuals participated as one  
326 of the parents in a sterile cross; 26 of these individuals were crossed against a separate  
327 individual, and they successfully produced seeds. Thus, sterility is specific to each parental  
328 combination, consistent with the idea that hybrid sterility is polymorphic in the system, a result  
329 that echoes those found in other systems (54, 55). Finally, we found that crosses had symmetric  
330 effects on reducing hybrid fitness: only six crosses displayed differences in hybrid sterility in the  
331 reciprocal cross. Reciprocal effects on reproductive isolation are inconsistent with the  
332 contribution of maternal genotypes to survivorship in the field, suggesting that not only maternal  
333 genotypes contribute to sterility in these populations. Together, these results imply a genetic  
334 association between the adaptive divergence of gravitropism and hybrid sterility in *S. lautus*.

335 To investigate whether *ENODL1* and *ABA3* alleles were associated with hybrid sterility, we  
336 examined if the predicted allele counts of the F12 offspring from the F11 parents explained the  
337 proportion of failed crosses. We found that the interaction between *ENODL1* and *ABA3* did not  
338 have a significant effect on sterility (Table 2). The *ABA3* A allele, on the other hand, had positive  
339 effect on hybrid sterility, where individuals with the gravitropic favored A allele, which is  
340 dominant to the G allele, had a higher percentage of failed crosses (Table 2). This suggests  
341 that *ABA3* might genetically link adaptive evolution of shoot gravitropism with hybrid sterility in  
342 *S. lautus*. Overall, our results support the hypothesis that intrinsic reproductive isolation can  
343 evolve as a by-product of adaptation to local conditions.

## 344 Discussion

345 Whether local adaptation commonly drives the formation of hybrid sterility and inviability is still  
346 a topic of debate (5, 16). These intrinsic reproductive barriers are believed to evolve late in the  
347 speciation process, often after extrinsic and prezygotic barriers have formed (e.g., immigrant  
348 inviability, or assortative mating) (4), and genetic drift or natural selection has led to the  
349 accumulation of genetic incompatibilities (2). There are few studies (9, 10) on the genetics of  
350 local adaptation and intrinsic reproductive isolation within a species, with most studies having  
351 focused on the effect of non-ecological evolution e.g., genetic conflict on the evolution of  
352 Dobzhansky-Muller incompatibilities (13). Our study is a step-forward in understanding the role  
353 of polygenic adaptation in creating hybrid sterility during the early stages of speciation. Here,  
354 we provide empirical evidence to suggest that natural selection is a major driving force behind  
355 the hybrid sterility found between recently derived erect and prostrate populations of *S. lautus*.  
356 Further, we identified variation in a trait in natural populations that could only result from  
357 divergence in specific hormonal pathways, thus suggesting the joint function of many genes  
358 could underlie the evolution of divergent traits correlated with reproductive barriers. The results  
359 from our set of experiments suggest a novel and broadly applicable explanation to the elusive  
360 link between the genetics of local adaptation and the evolution of intrinsic reproductive isolation.

361 Our results suggest that natural selection contributed to the colonization of extreme  
362 environments in *S. lautus*, like those found on rocky headlands along the coast. Previous  
363 population genetic results in this system (19, 26, 35) and those presented here suggest that  
364 the auxin pathway could facilitate plant adaptation to new habitats through concomitant  
365 changes in multiple developmental and architectural traits. Transitions from erect to prostrate  
366 growth and the associated traits of short stature and many branches, are common in plants  
367 that colonize coastal headlands (56-59), indicating that there are strong selective agents  
368 common to headland environments. For example, powerful winds or salty substrates could  
369 impose early selective pressures on traits controlled by auxins such as responses to  
370 mechanical cues (60) and halotropism (61-63). As the structure of hormonal pathways is  
371 generally conserved across plant species, the evolution of similar architectures in similar  
372 environments might prove to be a general mechanism to link adaptation with the incidental  
373 evolution of traits affecting species interactions such as ecological competition and reproductive  
374 success. For instance, in *Mimulus*, gibberellin (another essential plant hormone) has been  
375 recently implicated in local adaptation and associated with reproductive isolation between  
376 coastal and inland populations along the coast of California (42, 64). Like *S. lautus* Headland  
377 populations, coastal *Mimulus* populations are dwarf, salt-tolerant, and produce small amounts  
378 of gibberellin compared to inland populations (42, 65).

379 In *S. lautus*, previous results support a general link between local adaptation and intrinsic  
380 reproductive isolation. Walter, *et al.* (36) found that additive variance responsible for local  
381 adaptation in four ecotypes was lost in the creation of an F2 hybrid generation that displayed  
382 elevated levels of hybrid sterility. A similar occurrence of hybrid sterility occurred in the F2's  
383 that created the F11 generation used here (32), suggesting that genetic incompatibilities are  
384 segregating in multiple populations and ecotypes of *S. lautus*. However, the other generations  
385 of the hybrid population (F3-F11) are highly fertile, implying that a large proportion of the  
386 incompatible alleles between Dune and Headland populations were removed in the F2  
387 generation. Remarkably, we can recreate intrinsic reproductive isolation in the F11 hybrid  
388 population when we sort F11 families according to the strength of their gravitropic response;  
389 crosses between individuals with divergent gravitropism values have a reduced ability to  
390 produce seed. A likely explanation is that incompatibility alleles segregate at low frequencies  
391 in the population after the F2 generation, but we artificially increased the frequency of the  
392 incompatible alleles by selecting individuals with extreme gravitropism. Altogether these results  
393 provide strong evidence that adaptive traits, such as shoot gravitropism, are genetically  
394 correlated with hybrid sterility in *S. lautus*.

395 The mechanisms by which gravitropism and hybrid sterility are genetically correlated could be  
396 pleiotropy (e.g., Bomblies and Weigel (9)) or genetic linkage (e.g., Wright, Lloyd, Lowry,  
397 Macnair and Willis (10)), or a combination of both for polygenic traits. We speculate that  
398 pleiotropic effects of *ENODL1* and *ABA3* genes contributed to the correlated evolution of  
399 adaptive gravitropism and hybrid sterility. For example, *ABA3*, a strong candidate to generate  
400 variation in gravitropism, has been associated with pollen sterility in *Arabidopsis* (53), and it is  
401 known to contribute to salt tolerance in other organisms (51). It is not difficult to speculate  
402 evolutionary scenarios where hybrid sterility and gravitropism might be correlated responses to  
403 selection on saline environments: as the population adapts, compensatory mutations for  
404 reproduction can occur which are incompatible with genetic backgrounds from other  
405 populations. For *ENODL1*, we could not obtain many genotypes to properly test its role on  
406 hybrid sterility in *S. lautus*, but members of the *ENODL* family have a female-specific role in  
407 pollen tube reception (52). For example, in *Arabidopsis*, *enodl* mutants fail to arrest growth and  
408 rupture the entering pollen tube (52). The adaptive evolution of gravitropism through the  
409 maternal genotype in our adaptation experiments, also supports the notion that maternal  
410 *ENODLs* may be used to both communicate with the male pollen tube to enable reproduction  
411 and participate in adaptation to local conditions via its effects on gravitropism and correlated  
412 traits. The asymmetric reductions in seed set of *enodl* mutants contrasts with our symmetric  
413 reciprocal crosses. This discrepancy suggests that other factors other than maternal genetic  
414 effects contribute to reproductive isolation in *S. lautus*, possibly masking the effects of maternal  
415 genotypes in our experimental design. Future work will test the effect of *ENODL1* and *ABA3* on  
416 sterility using other genetic backgrounds and while considering novel genotypic combinations  
417 once we include other candidate genes in our genetic analyses.

418 Given that gravitropism has a polygenic basis and auxin related-genes have many pleiotropic  
419 effects on growth and development, and reproduction, our results suggest many genes likely  
420 drove local adaptation and only a subset of them contributes to hybrid sterility as they become  
421 part of a Dobzhansky-Muller incompatibility. This systems' view of the evolutionary process,  
422 where pleiotropic effects are pervasive, could provide fertile ground for the origin of adaptations  
423 and new species. Future genetic studies focusing on isolating sets of loci causing hybrid sterility  
424 in *S. lautus* will reveal the molecular mechanisms by which intrinsic reproductive barriers evolve  
425 together with local adaptation and will allow testing of these novel predictions on the origin of  
426 new species. Overall, our study showcases a powerful strategy to explore the genetic basis of  
427 local adaptation and speciation in natural systems. We postulate that the evolution of hormonal  
428 pathways in plants provides a simple mechanism for the rapid modification of co-regulated traits  
429 that facilitate the colonization of new habitats and the correlated evolution of hybrid sterility.

## 430 **Materials and Methods**

### 431 **Synthetic auxin and auxin transport inhibitor experiments**

432 We tested if auxins govern gravitropism in *S. lautus* by evaluating gravitropic responses in  
433 seedlings treated with chemicals affecting auxin signaling. Specifically, we used 2,4-



434 Dichlorophenoxyacetic acid (2,4-D), a carrier-dependent synthetic auxin (39, 66), and  
435 Naphthylphthalamic acid (NPA), an efflux inhibitor (40). Gravitropism was measured *in vitro* on  
436 agar plates on approximately 40 maternal families from Lennox Head sand dune and rocky  
437 headland. Seeds from an ecotype were combined in a falcon tube and were first sterilized with  
438 a quick rinse in 70% EtOH, followed by four 10-minute inversions in a sterilizing solution of 6%  
439 sodium hypochlorite and 1% Tween 20. Seeds were then rinsed three times with distilled water  
440 and vertically orientated on Murashiga and Skoog (MS) agar plates containing 0.15% MS,  
441 0.05% 2-(*N*-morpholino)-ethanesulfonic acid (MES), 0.15% sucrose, 1% agar and 2,4-D and  
442 NPA at concentrations of either 0  $\mu$ M, 0.5  $\mu$ M, 5  $\mu$ M, and 50 $\mu$ M. For the chemical  
443 concentrations, we used the following stock solutions: 2,4-D: 1mM in Ethanol and NPA: 10mM  
444 in dimethyl sulfoxide (DMSO). We created 1ml dilutions of stock solutions (in ethanol or DMSO),  
445 which were dissolved in 500 ml of media.

446 We placed eight seeds on each MS plate and incubated the plates at 21°C in a dark growth  
447 cabinet to avoid any light effects. After seven days, all plates were rotated clockwise by 90°  
448 and a photograph of each plate was taken 24 hours after rotation. All photographs were  
449 imported into ImageJ (67) to determine gravitropism by measuring the angle to which the stem  
450 reorientated to the horizontal (30, 68, 69). Seedlings were excluded from analyses if they were  
451 shorter than 5mm, contacted the plate's edge, or germinated after rotation. We were left with a  
452 total of 188 seedlings to quantify the gravitropic response. The 50 $\mu$ M concentration of 2,4-D  
453 treatment was excluded, as less than six seeds germinated under this high concentration (Data  
454 S4). For each chemical, we used a mixed linear model using the lmer function of lme4 package  
455 in R v3.1.3 (70):  $y_{ijkl} = A_k + E_i + C_j + E_i \times C_j + e_{l(ijk)}$ , where agar plate ( $A_k$ ) is the MS plate that the  
456 seeds were grown on, ecotype ( $E_i$ ) is Dune or Headland and concentration ( $C_j$ ) are the 4  
457 different concentrations of the chemical. Agar plate was fitted as a random effect, while ecotype,  
458 concentration and their interaction ( $E_i \times C_j$ ) were fixed effects, and  $e_{l(ijk)}$  is the residual error.  
459 Gravitropism ( $y_{ijkl}$ ) was compared using a Type II Wald chi-square test.

## 460 Phenotyping of natural populations

### 461 *Height measurements*

462 We measured plant height in all 16 populations in the glasshouse and 12 of the populations in  
463 their native field environment (Data S2 and Data S3). Height (vegetative) was measured as the  
464 vertical distance from the soil to the plant's highest point that has vegetative leaves (flowers  
465 and stems are not included). In the field, we measured height in 32 individuals evenly across  
466 the range of each population. In the controlled conditions of the glasshouse, we sampled an  
467 average of 14 individuals per population after plants reached maturity.

468 For both the glasshouse and field measurements, we used a linear model to determine whether  
469 Dune populations were taller than their adjacent Headland pair:  $y_{ijk} = P_i + E_{j(i)} + e_{k(ij)}$ , where pair  
470 ( $P_i$ ) is an adjacent Dune and Headland population at the same locality and ecotype ( $E_{j(i)}$ ) is  
471 Dune or Headland and is nested within pair. All factors are fixed effects and  $e_{k(ij)}$  is the residual  
472 error. Population height ( $y_{ijk}$ ) for each pair was compared using a one-tailed t-test (Table S6).  
473 The Alpine populations were also included with the prediction that the sheltered Alpine  
474 population (A03) would be taller than the exposed Alpine population (A07). All statistical results  
475 reported here were produced in JMP 13 (SAS 2015).

### 476 *Gravitropism measurements*

477 Gravitropism was measured *in vitro* on agar plates in a dark growth cabinet using seeds from  
478 all 16 natural populations. For each population, 2-4 seeds per family were grown for ~40  
479 maternal families (1,278 seeds in total). Plates were incubated, rotated, photographed, and  
480 gravitropism was measured in ImageJ (67), as outlined above. Overall, there was a 63.8%  
481 germination success, but seeds were excluded with the criteria above. This left a total of 736  
482 seedlings across all 16 populations (57.6% of the total number of seeds planted; Data S2). To  
483 test the hypothesis that Dune populations would have a stronger gravitropic response in their  
484 stem than their adjacent Headland pair, we used a mixed linear model:  $y_{ijkl} = P_i + E_{j(i)} + A_k +$   
485  $e_{l(ijk)}$ , where pair ( $P_i$ ) is an adjacent Dune and Headland population at the same locality, ecotype  
486 ( $E_{j(i)}$ ) is Dune or Headland and is nested within pair, and agar plate ( $A_k$ ) is the MS plate that the

487 seeds were grown on. Agar plate was fitted as a random effect while the rest were fixed effects,  
488 and  $e_{i(j)k}$  is the residual error. Gravitropism ( $y_{ijki}$ ) measures were averaged for each population  
489 and compared between each population pair using a one-tailed t-test (Table S6). We then  
490 tested the correlation between height and gravitropism by performing a linear regression with  
491 mean height against mean gravitropism for all 16 populations, where populations were grouped  
492 into their respective clades (eastern and south-eastern). All statistical results reported here  
493 were produced in JMP 13 (SAS 2015).

#### 494 **Field experiments**

495 All field experiments were conducted at the sand dune and rocky headland at Lennox Head  
496 (NSW) in the exact location where native *S. laetus* grow. We tracked each individual by gluing  
497 each seed to a toothpick with non-drip superglue and placing them 1-2mm under the ground  
498 within a grid cell (Fig. 4) that was randomly assigned (for details see Walter, *et al.* (32)). 50%  
499 shade cloth was suspended 15cm above all plots to replicate the shade given by surrounding  
500 vegetation and was later replaced with very light bird netting. Seeds were watered twice a day  
501 to keep the soil moist and replicate ideal germination conditions to maximize the number of  
502 seeds in the experiment. Once germination plateaued for all genotypes watering was gradually  
503 ceased.

#### 504 *Height adaptation experiments*

505 We created genetic lines that aimed to isolate height differences on a common genomic  
506 background (Fig. S3). Firstly, Lennox Head Dune and Headland seeds were grown and crossed  
507 to create an F1 generation. Secondly, we backcrossed to Headland parental plants for two  
508 generations to produce a BC2F1 generation. We then grew and crossed the tallest BC2F1  
509 individuals among one another ( $n=16$ , tallest 10% of the population), and the shortest  
510 individuals among one another ( $n=18$ , shortest 10% of the population). See Table S2 for the  
511 number of individuals and families contributing to every generation to create these BC2F2  
512 genetic lines. The BC2F2 seeds were planted into the rocky headland at Lennox Head in  
513 October 2016 (Australian spring). We planted five replicate plots, where each plot (1.08x0.33m)  
514 consisted of the same 12 families with four (occasionally three) individuals per family in each  
515 plot, totaling 1,116 BC2F2 seeds. Germination and mortality were recorded every day for 49  
516 days, then every 3-4 days until day 79, and then weekly for the remainder of the experiment,  
517 until day 159 (Data S5).

518 We implemented a mixed linear model to test the hypothesis that individuals with short parents  
519 will have higher fitness in the headland environment:  $y_{ijki} = H_i + F_j + B_k + e_{i(j)k}$ , where parental  
520 height ( $H_i$ ) was the average height of the parents measured in the glasshouse, family ( $F_j$ ) as  
521 individuals with the same parents, and block ( $B_k$ ) as the five replicate plots across the rocky  
522 headland. Parental height is a fixed effect, and family and block are random effects, and  $e_{i(j)k}$   
523 was the residual error. Offspring fitness ( $y_{ijki}$ ) was the total number of days alive in the rocky  
524 headland from planting. All statistical results reported here were produced in JMP 13 (SAS  
525 2015).

#### 526 *Gravitropism adaptation experiments*

527 We created an advanced recombinant population (F8) from 23 Dune and 22 Headland Lennox  
528 Head individuals using a North Carolina 2 breeding design (71, 72) as described in Roda,  
529 Walter, Nipper and Ortiz-Barrientos (26). Briefly, we replicated the construction of the F8 using  
530 three independent replicate crossing lines (A, B, and C), all derived from the same base  
531 population. See Table S3 for the number of families per replicate genetic line for every  
532 generation. F8 seeds were planted into the sand dune and rocky headlands in 2012 as  
533 described above. The fittest families (top 50%) within an environment (and genetic line) were  
534 selected using Aster modeling (73, 74) implemented with the 'Aster' package in R (70). The  
535 fitness components included germination and survival success, where germination was the  
536 total number of individuals that germinated in each family, and survival success was the total  
537 number of individuals per family that survived to day 85 in the F8 generation. One full sibling  
538 from the 101 selected families (50 Dune survivor and 51 Headland survivor families) and 44  
539 families randomly selected from all F8 families for the control population were then grown in

540 the glasshouse. Each individual was randomly assigned as a dam or sire and, after reaching  
541 maturity, crossed twice in a full-sibling, half-sibling crossing design. This approach maintained  
542 ~100 full-sibling families for each population (Dune survivors, Headland survivors and Control).  
543 The same field experiment and selection procedure was conducted on the F9 (in 2013) and  
544 F10 generations (in 2014) for three rounds of selection, where survival success was measured  
545 at day 138 in the F9 generation, and at day 232 in the F10 generation. See Table S4 for the  
546 number of seeds and families planted per genetic line and environment for the three transplant  
547 experiments.

#### 548 **Reference genome**

549 Headland individuals from Lennox Head were used for the creation of an Illumina *S. lautus*  
550 reference genome. Firstly, we collected seeds from the Headland at Lennox Head and  
551 germinated seeds from two individuals by cutting 1mm off the micropyle side of the seed and  
552 placing in petri dishes with dampened filter paper. The seeds were placed in darkness for two  
553 days to allow for roots to grow and then transferred to a 12-hour light cycle in a constant  
554 temperature room at 25°C for seven days to allow for shoots to grow. Seedlings were then  
555 transferred into large individual pots with standard potting mix and grown in a glasshouse.  
556 These two individuals were crossed by rubbing flower heads together and collecting the seeds  
557 produced. Siblings from the seeds produced were grown and crossed by rubbing flower heads  
558 together to produce a family of individuals capable of self-fertilization (rare in *S. lautus*). One  
559 generation of selfing was completed to increase homozygosity. We extracted DNA from the  
560 leaf tissue of one individual using a modified CTAB protocol (75).

561 A draft genome of *S. lautus* was de novo assembled using second-generation short reads and  
562 AllPaths-LG 6.1.2 using default settings. We utilized a series of eight read libraries (Table S7).  
563 The reads were trimmed to remove residual adapter sequences and low-quality bases  
564 (minimum quality 15). The final assembly was ~843 MB long and consisted of 96,372 scaffolds  
565 with an N50 of 21 KB. Although 843 MB is much shorter than the expected haploid size of 1.38  
566 GB (76) of the whole genome, the BUSCO gene content completeness of 84% (5% fragmented  
567 and 11% missing) suggests that this assembly is primarily missing intergenic repetitive DNA  
568 sequences, which are notoriously difficult to assemble.

#### 569 **F11 gravitropism measurements**

570 In the F11 generation described above, we measured gravitropism as the angle of the stem  
571 after a 90° rotation of a seedling. This included 39 Dune survivor families, 37 Headland survivor  
572 families and 25 inbred control families with 12 individuals per family (1,212 seeds in total).  
573 These families were germinated in three separate batches ~seven days apart. Briefly, we  
574 germinated the F11 seeds by cutting 1mm off the micropyle side of the seed and placing in  
575 petri dishes with dampened filter paper. The seeds were placed in darkness for two days to  
576 enable roots to grow and then transferred to light for 4 days for shoots to grow. Seedlings were  
577 then transferred into small square pots with standard potting mix in a constant temperature  
578 room at 25°C with a 12-hour light cycle. After one week of growing in the pot, the plants were  
579 rotated by 90° and a photograph of each individual was taken 12 hours after rotation. The  
580 photographs were imported into ImageJ (67) to measure gravitropism as described above. Data  
581 S6 contains gravitropism measures and dam and sire fitness values.

#### 582 *Gravitropism tests of selection*

583 We implemented a linear model to test the hypothesis that high fitness Dune families will  
584 produce gravitropic offspring and high fitness Headland families produce agravitropic offspring.  
585 Independent models were used for the sand dune and rocky headland to test the effect of  
586 gravitropism on fitness in each environment:  $y_{ijklmn} = B_i + V_j + G_{k(i)} + D_{l(ik)} + S_{m(ik)} + e_{n(ijklm)}$ , where  
587 temporal block ( $B_i$ ) is the three time points in which the F11 seeds were grown (~seven days  
588 apart); intrinsic viability ( $V_j$ ) is the number of days until the death of F11 plants in controlled  
589 conditions; and genetic line, which consists of the three independent genetic lines (A, B and  
590 C), is nested within the temporal block ( $G_{k(i)}$ ). Dam fitness was nested in genetic line and  
591 temporal block ( $D_{l(ik)}$ ) and sire fitness was also nested in genetic line and temporal block ( $S_{m(ik)}$ ).  
592 Dam and sire fitness is the F10 family fitness values for the individuals that were crossed to

593 create the F11 offspring where gravitropism was measured. All factors were included as fixed  
594 effects, and  $e_{n(ijklm)}$  was the residual error. Genetic line C was removed from analyses as it has  
595 little variation in fitness values, which means it did not converge. Shapiro-Wilk  $W$  test shows  
596 the residuals from the model are normally distributed for both the sand dune ( $W=0.98$ ,  
597  $P=0.3879$ ) and rocky headland ( $W=0.98$ ,  $P=0.2776$ ). The linear model was performed in JMP  
598 13 (SAS 2015).

#### 599 *Genetic association between height and gravitropism*

600 We tested the genetic association between height and gravitropism after segregation in an  
601 advanced recombinant population. We implemented a mixed linear model for the three F11  
602 populations (Dune survivors, Headland survivors, and a Control population) that accounts for  
603 family variation:  $y_{ijk} = H_i + F_j + e_{k(ij)}$ , where gravitropism ( $y_{ijk}$ ) is the angle of the growth response  
604 12 hours after a 90° rotation, height ( $H_i$ ) is the vertical distance from the soil to the top of the  
605 vegetative leaves, measured after maturity in the glasshouse and family ( $F_j$ ) is a random effect  
606 that consists of individuals that have the same dam and sire. The mixed linear model was  
607 performed in JMP 13 (SAS 2015).

#### 608 *Genotyping of F11 gravitropism tails*

609 To isolate gravitropism candidate genes, we genotyped 77 gravitropic (>56°) and 68  
610 agravitropic (<20°) F11 individuals (Data S6). We extracted DNA from leaf tissue using a  
611 modified CTAB protocol (75) and quantified the DNA using the PicoGreen reagent (Invitrogen,  
612 Carlsbad, CA). To determine which parent the alleles were derived from, we included 39 Dune  
613 parentals (D01) and 41 Headland parentals (H01). Leaves from the Lennox Head Dune and  
614 Headland natural populations were collected directly from the field and the same DNA  
615 extraction protocol was followed. Each F11 individual was duplicated in independent wells and  
616 libraries of Restriction-site Associated DNA (RAD) tags were created at Floragenex following  
617 Baird, *et al.* (77), but using the PstI restriction enzyme. We sequenced 380 samples on four  
618 lanes of an Illumina HiSeq 4000 with 91bp single-end reads at Floragenex. A total of 1.39 billion  
619 reads with a mean of 3.62 million reads per sample were produced. Reads were aligned to the  
620 Illumina reference genome using Bowtie 1.1.1 (78) and a FASTQ quality score of above 20.  
621 We then used SAMtools 0.1.16 (79) to create an mpileup file of all samples with a minimum  
622 Phred quality score of 10, minimum sequencing depth per sample of 6x and minimum per cent  
623 of population genotyped of 75%. This approach produced 26.8K variable positions (224K  
624 variants before filtering) with a minimum distance between variants of 50bp. The gravitropism  
625 candidate gene set consisted of SNPs in the 99.9% quantile of the distribution of differentiated  
626 SNPs between the gravitropism tails. The region of the scaffold containing the SNP was  
627 annotated using the BLASTx NCBI database (80).

#### 628 *Senecio lautus gravitropism candidate genes*

629 We tested for overrepresentation of gene function and linkage disequilibrium between  
630 gravitropism loci in the gravitropism candidate gene set. A statistical overrepresentation test  
631 was performed in PANTHER (<http://pantherdb.org/>) using the TAIR identification for 32 unique  
632 gravitropism candidate genes matched to a reference list of 27,502 *Arabidopsis thaliana* genes.  
633 To calculate linkage disequilibrium between loci, a likelihood-ratio chi-square test was  
634 performed in JMP 13 (SAS 2015) with each F11 population independently (Dune survivors,  
635 Headland survivors and Control; Data S7).

#### 636 **Intrinsic reproductive isolation**

##### 637 *Gravitropism and hybrid sterility correlation*

638 We tested whether hybrid sterility was associated with gravitropism by randomly crossing within  
639 and between the F11 gravitropic and agravitropic groups in a controlled temperature room and  
640 recording successful and failed crosses. To maximize sample size, all three replicate genetic  
641 lines (A, B, and C) were used across all three environments (Dune survivors, Headland  
642 survivors, and Control). A total of 138 crosses were completed (Data S8), 71 crosses between  
643 the tails and 67 within the tails (agravitropic tail = 29 and gravitropic tail = 38). Crosses were



644 completed by rubbing multiple flower heads of two individuals and collecting the seeds  
645 produced from both plants. To remove genetic incompatibilities that might be caused by  
646 relatedness, crosses within the same family were not performed. Hybrid sterility (a failed cross)  
647 was considered when, in the presence of pollen, less than three seeds were produced per  
648 flower head from both plants (reciprocal crosses) with three mating attempts. Here, hybrid  
649 sterility could be caused by failure to produce fertilized ovules (prezygotic), or by fertilized  
650 ovules failing to develop into viable seeds (postzygotic). Six crosses displayed differences in  
651 sterility in the reciprocal cross (asymmetry), with one successful and one failed cross when  
652 using the same parents, and so were removed from the analysis (4 crosses between the tails  
653 and two within the tails).

654 If gravitropism contributed to divergence in *S. laetus*, we expected to observe an increase in  
655 hybrid sterility in crosses between gravitropic and agravitropic individuals. We performed a  
656 linear model in JMP 14 (SAS, 2018) to determine whether there was a significant association  
657 between cross-type (within vs between gravitropism tails) and hybrid sterility while accounting  
658 for genetic line and F11 population:  $y_{ijkl} = T_i + G_j + P_k + e_{l(ijk)}$ , where tails ( $T_i$ ) is crosses within or  
659 between gravitropism tails, genetic line ( $G_j$ ) are the three independent genetic lines (A, B and  
660 C) and population ( $P_k$ ) are the three F11 populations (Dune survivors, Headland survivors, and  
661 Control). All factors were included as fixed effects, and  $e_{l(ijk)}$  was the residual error. Hybrid  
662 fertility ( $y_{ijkl}$ ) was compared using a likelihood-ratio chi-square test.

### 663 *ENODL1* and *ABA3* association with hybrid sterility

664 We implemented a linear model to test the hypothesis that *ENODL1* and *ABA3* alleles are  
665 correlated with hybrid sterility. From the F11 individuals that were crossed, we extracted their  
666 genotypes and predicted the genotypes of their offspring (F12). Genotypes that were  
667 ambiguous due to heterozygous parents were removed, which reduced the sample size to 61  
668 crosses in which 11 were failed crosses (Data S9). We tested the effect of *ENODL1* and *ABA3*  
669 alleles and their interaction on the percentage of failed crosses:  $y_{ijk} = E_i + A_j + EA_{ij} + e_{k(ij)}$ , where  
670 *ENODL1* ( $E_i$ ) is the allele counts for the *ENODL1* C allele in the F12's; *ABA3* ( $A_j$ ) is the allele  
671 counts for the *ABA3* G allele in the F12's; and *ENODL1* x *ABA3* ( $EA_{ij}$ ) is their interaction. All  
672 factors were included as fixed effects, and  $e_{k(ij)}$  was the residual error. Shapiro-Wilk W test  
673 shows the residuals from the model are normally distributed ( $W=0.94$ ,  $P=0.6314$ ). The linear  
674 model was performed in JMP 15 (SAS 2015).

### 675 **Acknowledgments**

676 We are grateful to S. Smith, L.H. Rieseberg, M. Cooper, J. Engelstaedter, M.A.F. Noor and  
677 members of the Ortiz-Barrientos laboratory for insightful comments on previous versions of this  
678 manuscript. S. Karrenberg and S. Chenoweth provided instrumental feedback on M.J.  
679 Wilkinson Ph.D. dissertation. We thank P. Brewer for his help in the design and execution of  
680 gravitropism experiments. We would also like to thank everyone that helped with the field  
681 selection experiments: E. Johnston, E. Monley, G. Wilkinson, P. Wilkinson, A. Mather, S.  
682 Thang, K. Giarola, G. Lebbink, E. Firkins-Barriere, P. Arnold, J. Donohoe, B. Brittain, H. Liu, D.  
683 Bernal, M.C. Melo, T. Richards, J. Walter, L. Ambrose, B. Ayalon, S. Carrol, M. Gallo, A.  
684 Maynard, C. Palmer, and S. Edgley.

### 686 **Author Contributions**

687 MJW, FR and DO conceived the projects and experiments. MJW conducted height adaptation  
688 experiments, reared and phenotyped various glasshouse populations and performed  
689 reproductive isolation experiment. FR and MJW performed physiological and molecular biology  
690 experiments. GMW reared and phenotyped the natural populations in the glasshouse with help  
691 from MJW and MEJ. GMW conducted the field experiment for the gravitropism adaptation  
692 experiments with assistance from MJW, MEJ, FR and DO. MJW, MEJ and HLN phenotyped  
693 natural populations. MEJ and MJW extracted the DNA from the F11's and RN and JW called  
694 the genotypes. MEJ reared the plants and prepared the Illumina libraries for SA to assemble  
695 the *S. laetus* genome. CB guided the physiological experiments. MJW and DO wrote the paper  
696 with input from all authors. DO secured the funds and is mentor and supervisor for the research  
697 program.

## 699 References

- 700 1. C. Darwin, *On the origins of species by means of natural selection* (London: Murray,  
701 1859), vol. 247, pp. 1859.
- 702 2. J. A. Coyne, H. A. Orr, *Speciation* (Sinauer Associates, Sunderland, MA, 2004).
- 703 3. H. D. Rundle, M. C. Whitlock, A genetic interpretation of ecologically dependent  
704 isolation. *Evolution* **55**, 198-201 (2001).
- 705 4. O. Seehausen *et al.*, Genomics and the origin of species. *Nat. Rev. Genet.* **15**, 176-  
706 192 (2014).
- 707 5. E. Baack, M. C. Melo, L. H. Rieseberg, D. Ortiz-Barrientos, The origins of  
708 reproductive isolation in plants. *New Phytol.* **207**, 968-984 (2015).
- 709 6. J. M. Coughlan, D. R. Matute, The importance of intrinsic postzygotic barriers  
710 throughout the speciation process. *Philosophical Transactions of the Royal Society*  
711 *B-Biological Sciences* **375** (2020).
- 712 7. D. Schluter, G. L. Conte, Genetics and ecological speciation. *Proc. Natl. Acad. Sci.*  
713 *USA* **106**, 9955 (2009).
- 714 8. D. B. Lowry, R. C. Rockwood, J. H. Willis, Ecological reproductive isolation of coast  
715 and inland races of *Mimulus guttatus*. *Evolution* **62**, 2196-2214 (2008).
- 716 9. K. Bomblies, D. Weigel, Hybrid necrosis: autoimmunity as a potential gene-flow  
717 barrier in plant species. *Nat. Rev. Genet.* **8**, 382 (2007).
- 718 10. K. M. Wright, D. Lloyd, D. B. Lowry, M. R. Macnair, J. H. Willis, Indirect evolution of  
719 hybrid lethality due to linkage with selected locus in *Mimulus guttatus*. *PLoS Biol.* **11**,  
720 e1001497 (2013).
- 721 11. M. Kirkpatrick, N. Barton, Chromosome inversions, local adaptation and speciation.  
722 *Genetics* **173**, 419 (2006).
- 723 12. A. F. Agrawal, J. L. Feder, P. Nosil, Ecological Divergence and the Origins of Intrinsic  
724 Postmating Isolation with Gene Flow. *International Journal of Ecology* **2011**, 435357  
725 (2011).
- 726 13. D. C. Presgraves, The molecular evolutionary basis of species formation. *Nat. Rev.*  
727 *Genet.* **11**, 175-180 (2010).
- 728 14. A. Burt, R. Trivers, *Genes in Conflict: The Biology of Selfish Genetic Elements*  
729 (Harvard University Press, 2006).
- 730 15. S. A. Johnston, T. P. M. den Nijs, S. J. Peloquin, R. E. Hanneman, The significance  
731 of genic balance to endosperm development in interspecific crosses. *Theor. Appl.*  
732 *Genet.* **57**, 5-9 (1980).
- 733 16. L. Fishman, A. L. Sweigart, When two rights make a wrong: The evolutionary  
734 genetics of plant hybrid incompatibilities. *Annu. Rev. Plant Biol.* 10.1146/annurev-  
735 arplant-042817-040113 (2018).
- 736 17. I. J. Radford, R. D. Cousens, P. W. Michael, Morphological and genetic variation in  
737 the *Senecio pinnatifolius* complex: are variants worthy of taxonomic recognition?  
738 *Aust. Syst. Bot.* **17**, 29-48 (2004).
- 739 18. I. Thompson, *Taxonomic studies of Australian Senecio (Asteraceae): 5. The S.*  
740 *lautus/S. lautus complex.*, Muelleria (Royal Botanic Gardens, Melbourne, 2005).
- 741 19. F. Roda *et al.*, Convergence and divergence during the adaptation to similar  
742 environments by an Australian groundsel. *Evolution* **67**, 2515-2529 (2013).
- 743 20. M. E. James, M. J. Wilkinson, H. L. North, J. Engelstädter, D. Ortiz-Barrientos, A  
744 framework to quantify phenotypic and genotypic parallel evolution. *bioRxiv*  
745 10.1101/2020.02.05.936450 (2020).
- 746 21. M. Xu, L. Zhu, H. Shou, P. Wu, A PIN1 family gene, OsPIN1, involved in auxin-  
747 dependent adventitious root emergence and tillering in rice. *Plant Cell Physiol.* **46**,  
748 1674-1681 (2005).
- 749 22. J. G. Wallace *et al.*, Genome-wide association for plant height and flowering time  
750 across 15 tropical maize populations under managed drought stress and well-  
751 watered conditions in Sub-Saharan Africa. *Crop Sci.* **56**, 2365-2378 (2016).
- 752 23. A. Gallavotti, The role of auxin in shaping shoot architecture. *J. Exp. Bot.* **64**, 2593-  
753 2608 (2013).
- 754 24. M. a. Domagalska, O. Leyser, Signal integration in the control of shoot branching.  
755 *Nat. Rev. Mol. Cell Biol.* **12**, 211-221 (2011).

- 756 25. J.-Z. Wu, Y. Lin, X.-L. Zhang, D.-W. Pang, J. Zhao, IAA stimulates pollen tube growth  
757 and mediates the modification of its wall composition and structure in *Torenia*  
758 *fournieri*. *J. Exp. Bot.* **59**, 2529-2543 (2008).
- 759 26. F. Roda, G. M. Walter, R. Nipper, D. Ortiz-Barrientos, Genomic clustering of adaptive  
760 loci during parallel evolution of an Australian wildflower. *Mol. Ecol.* **26**, 3687–3699  
761 (2017).
- 762 27. M. E. James, H. Arenas-Castro, J. S. Groh, J. Engelstädter, D. Ortiz-Barrientos,  
763 Highly replicated evolution of parapatric ecotypes. *bioRxiv*  
764 10.1101/2020.02.05.936401, 2020.2002.2005.936401 (2020).
- 765 28. J. Friml, Auxin transport—shaping the plant. *Curr. Opin. Plant Biol.* **6**, 7-12 (2003).
- 766 29. D. Lopez, K. Tocquard, J.-S. Venisse, V. Legué, P. Roedel-Drevet, Gravity sensing,  
767 a largely misunderstood trigger of plant orientated growth. *Front. Plant Sci.* **5** (2014).
- 768 30. D. Sang *et al.*, Strigolactones regulate rice tiller angle by attenuating shoot  
769 gravitropism through inhibiting auxin biosynthesis. *Proc. Natl. Acad. Sci. USA* **111**,  
770 11199-11204 (2014).
- 771 31. M. C. Melo, A. Grealy, B. Brittain, G. M. Walter, D. Ortiz-Barrientos, Strong extrinsic  
772 reproductive isolation between parapatric populations of an Australian groundsel.  
773 *New Phytol.* **203**, 323-334 (2014).
- 774 32. G. M. Walter *et al.*, Diversification across a heterogeneous landscape. *Evolution* **70**,  
775 1979-1992 (2016).
- 776 33. G. M. Walter, M. J. Wilkinson, J. D. Aguirre, M. W. Blows, D. Ortiz-Barrientos,  
777 Environmentally induced development costs underlie fitness tradeoffs. *Ecology* **99**,  
778 1391-1401 (2018).
- 779 34. T. J. Richards, G. M. Walter, K. McGuigan, D. Ortiz-Barrientos, Divergent natural  
780 selection drives the evolution of reproductive isolation in an Australian wildflower.  
781 *Evolution* **70**, 1993-2003 (2016).
- 782 35. F. Roda *et al.*, Genomic evidence for the parallel evolution of coastal forms in the  
783 *Senecio laetus* complex. *Mol. Ecol.* **22**, 2941-2952 (2013).
- 784 36. G. M. Walter *et al.*, Loss of ecologically important genetic variation in late generation  
785 hybrids reveals links between adaptation and speciation. *Evolution Letters* **4**, 302-316  
786 (2020).
- 787 37. L. Fishman, J. H. Willis, Evidence for Dobzhansky-Muller incompatibilities contributing  
788 to the sterility of hybrids between *Mimulus guttatus* and *M. nasutus*. *Evolution* **55**,  
789 1932-1942 (2001).
- 790 38. R. B. Stelkens, C. Schmid, O. Seehausen, Hybrid breakdown in cichlid fish. *PLOS*  
791 *One* **10**, e0127207 (2015).
- 792 39. M. Yamamoto, K. T. Yamamoto, Differential effects of 1-naphthaleneacetic acid,  
793 indole-3-acetic acid and 2,4-dichlorophenoxyacetic acid on the gravitropic response  
794 of roots in an auxin-resistant mutant of *Arabidopsis*, *aux1*. *Plant Cell Physiol.* **39**, 660-  
795 664 (1998).
- 796 40. I. Ottensläger *et al.*, Gravity-regulated differential auxin transport from columella to  
797 lateral root cap cells. *Proc. Natl. Acad. Sci. USA* **100**, 2987-2991 (2003).
- 798 41. E. B. Blancaflor, Regulation of plant gravity sensing and signaling by the actin  
799 cytoskeleton. *Am. J. Bot.* **100**, 143-152 (2013).
- 800 42. D. B. Lowry, D. Popovic, D. J. Brennan, L. M. Holeski, Mechanisms of a locally  
801 adaptive shift in allocation among growth, reproduction, and herbivore resistance in  
802 *Mimulus guttatus*\*. *Evolution* **73**, 1168-1181 (2019).
- 803 43. L. Barboza *et al.*, *Arabidopsis* semidwarfs evolved from independent mutations in  
804 *GA20ox1*, ortholog to green revolution dwarf alleles in rice and barley. *Proc. Natl.*  
805 *Acad. Sci. USA* **110**, 15818-15823 (2013).
- 806 44. P. Ranocha *et al.*, Walls are thin 1 (WAT1), an *Arabidopsis* homolog of *Medicago*  
807 *truncatula* NODULIN21, is a tonoplast-localized protein required for secondary wall  
808 formation in fibers. *The Plant Journal* **63**, 469-483 (2010).
- 809 45. P. Ranocha *et al.*, *Arabidopsis* WAT1 is a vacuolar auxin transport facilitator required  
810 for auxin homeostasis. *Nature Communications* **4**, 2625 (2013).
- 811 46. S. Promchuea, Y. Zhu, Z. Chen, J. Zhang, Z. Gong, ARF2 coordinates with  
812 PLETHORAs and PINs to orchestrate ABA-mediated root meristem activity in  
813 *Arabidopsis*. *J. Integr. Plant Biol.* **59**, 30-43 (2017).

- 814 47. X. Dai, K.-i. Hayashi, H. Nozaki, Y. Cheng, Y. Zhao, Genetic and chemical analyses  
815 of the action mechanisms of sirtinol in *Arabidopsis*. *Proceedings of the National*  
816 *Academy of Sciences of the United States of America* **102**, 3129 (2005).
- 817 48. M. Sagi, C. Scazzocchio, R. Fluhr, The absence of molybdenum cofactor sulfuration  
818 is the primary cause of the flacca phenotype in tomato plants. *The Plant Journal* **31**,  
819 305-317 (2002).
- 820 49. H. Wu, Y. Shen, Y. Hu, S. Tan, Z. Lin, A phytoeyanin-related early nodulin-like gene,  
821 BcBCP1, cloned from *Boea crassifolia* enhances osmotic tolerance in transgenic  
822 tobacco. *J. Plant Physiol.* **168**, 935-943 (2011).
- 823 50. H. Ma, H. Zhao, Z. Liu, J. Zhao, The phytoeyanin gene family in rice (*Oryza sativa* L.):  
824 Genome-wide identification, classification and transcriptional analysis. *PLOS One* **6**,  
825 e25184 (2011).
- 826 51. J. Garcia de la Garma *et al.*, New insights into plant salt acclimation: the roles of  
827 vesicle trafficking and reactive oxygen species signalling in mitochondria and the  
828 endomembrane system. *New Phytol.* **205**, 216-239 (2015).
- 829 52. Y. Hou *et al.*, Maternal ENODLs are required for pollen tube reception in *Arabidopsis*.  
830 *Curr. Biol.* **26**, 2343-2350 (2016).
- 831 53. H.-H. Wang *et al.*, Close arrangement of CARK3 and PMEIL affects ABA-mediated  
832 pollen sterility in *Arabidopsis thaliana*. *Plant, Cell Environ.* **43**, 2699-2711 (2020).
- 833 54. A. Sicard *et al.*, Divergent sorting of a balanced ancestral polymorphism underlies the  
834 establishment of gene-flow barriers in *Capsella*. *Nature Communications* **6**, 7960  
835 (2015).
- 836 55. A. L. Sweigart, L. E. Flagel, Evidence of natural selection acting on a polymorphic  
837 hybrid incompatibility locus in *Mimulus*. *Genetics* **199**, 543-554 (2015).
- 838 56. W. Beeftink, J. Rozema, A. Huiskes, *Ecology of coastal vegetation* (Springer, 1985),  
839 vol. 6.
- 840 57. T. Auld, D. Morrison, Genetic determination of erect and prostrate growth habit in five  
841 shrubs from windswept headlands in the Sydney region. *Aust. J. Bot.* **40**, 1-11 (1992).
- 842 58. D. Morrison, A. Rupp, Patterns of morphological variation within *Acacia suaveolens*  
843 (*Mimosaceae*). *Aust. Syst. Bot.*, 1013-1027 (1995).
- 844 59. G. M. Crutsinger, S. Y. Strauss, J. a. Rudgers, Genetic variation within a dominant  
845 shrub species determines plant species colonization in a coastal dune ecosystem.  
846 *Ecology* **91**, 1237-1243 (2010).
- 847 60. T. Li *et al.*, Calcium signals are necessary to establish auxin transporter polarity in a  
848 plant stem cell niche. *Nature Communications* **10**, 726 (2019).
- 849 61. V. Naser, E. Shani, Auxin response under osmotic stress. *Plant Mol. Biol.* **91**, 661-  
850 672 (2016).
- 851 62. T. van den Berg, R. A. Korver, C. Testerink, K. H. ten Tusscher, Modeling  
852 halotropism: a key role for root tip architecture and reflux loop remodeling in  
853 redistributing auxin. *Development* **143**, 3350-3362 (2016).
- 854 63. C. S. Galvan-Ampudia *et al.*, Halotropism is a response of plant roots to avoid a  
855 saline environment. *Curr. Biol.* **23**, 2044-2050 (2013).
- 856 64. D. B. Lowry, J. H. Willis, A widespread chromosomal inversion polymorphism  
857 contributes to a major life-history transition, local adaptation, and reproductive  
858 isolation. *PLoS Biol.* **8**, e1000500 (2010).
- 859 65. D. B. Lowry, M. C. Hall, D. E. Salt, J. H. Willis, Genetic and physiological basis of  
860 adaptive salt tolerance divergence between coastal and inland *Mimulus guttatus*.  
861 *New Phytol.* **183**, 776-788 (2009).
- 862 66. Y. Yang, U. Z. Hammes, C. G. Taylor, D. P. Schachtman, E. Nielsen, High-affinity  
863 auxin transport by the AUX1 influx carrier protein. *Curr. Biol.* **16**, 1123-1127 (2006).
- 864 67. C. A. Schneider, W. S. Rasband, K. W. Eliceiri, NIH Image to ImageJ: 25 years of  
865 image analysis. *Nat. Methods* **9**, 671-675 (2012).
- 866 68. G. Rigo *et al.*, Inactivation of plasma membrane-localized CDPK-RELATED KINASE5  
867 decelerates PIN2 exocytosis and root gravitropic response in *Arabidopsis*. *The Plant*  
868 *Cell* **25**, 1592-1608 (2013).
- 869 69. A. M. Rashotte, S. R. Brady, R. C. Reed, S. J. Ante, G. K. Muday, Basipetal auxin  
870 transport is required for gravitropism in roots of *Arabidopsis*. *Plant Physiol.* **122**, 481-  
871 490 (2000).
- 872 70. R Core Team, R: A language and environment for statistical computing. *R*  
873 *Foundation for Statistical Computing, Vienna, Austria* (2013).



- 874 71. M. Lynch, B. Walsh, *Genetics and analysis of quantitative traits* (Sinauer Associates  
875 Inc, Sunderland, U.S.A, 1998).
- 876 72. M. V. Rockman, L. Kruglyak, Breeding designs for recombinant inbred advanced  
877 intercross lines. *Genetics* **179**, 1069-1078 (2008).
- 878 73. C. J. Geyer, S. Wagenius, R. G. Shaw, Aster models for life history analysis.  
879 *Biometrika* **94**, 415-426 (2007).
- 880 74. R. G. Shaw, C. J. Geyer, S. Wagenius, H. H. Hangelbroek, J. R. Etterson, Unifying  
881 life-history analyses for inference of fitness and population growth. *The American*  
882 *Naturalist* **172**, E35-E47 (2008).
- 883 75. J. D. Clarke, Cetyltrimethyl ammonium bromide (CTAB) DNA miniprep for plant DNA  
884 isolation. *Cold Spring Harb. Protoc.* **2009**, pdb.prot5177 (2009).
- 885 76. H. Liu (2015) Developing genomic resources for an emerging ecological model  
886 species *Senecio laetus*. in *School of Biological Sciences* (The University of  
887 Queensland), p 274.
- 888 77. N. A. Baird *et al.*, Rapid SNP discovery and genetic mapping using sequenced RAD  
889 markers. *PLOS One* **3**, 1-7 (2008).
- 890 78. B. Langmead, C. Trapnell, M. Pop, S. L. Salzberg, Ultrafast and memory-efficient  
891 alignment of short DNA sequences to the human genome. *Genome Biology* **10**, R25  
892 (2009).
- 893 79. H. Li *et al.*, The sequence alignment/map format and SAMtools. *Bioinformatics* **25**,  
894 2078-2079 (2009).
- 895 80. S. F. Altschul, W. Gish, W. Miller, E. W. Myers, D. J. Lipman, Basic local alignment  
896 search tool. *J. Mol. Biol.* **215**, 403-410 (1990).

897

898 **Figures and Tables**

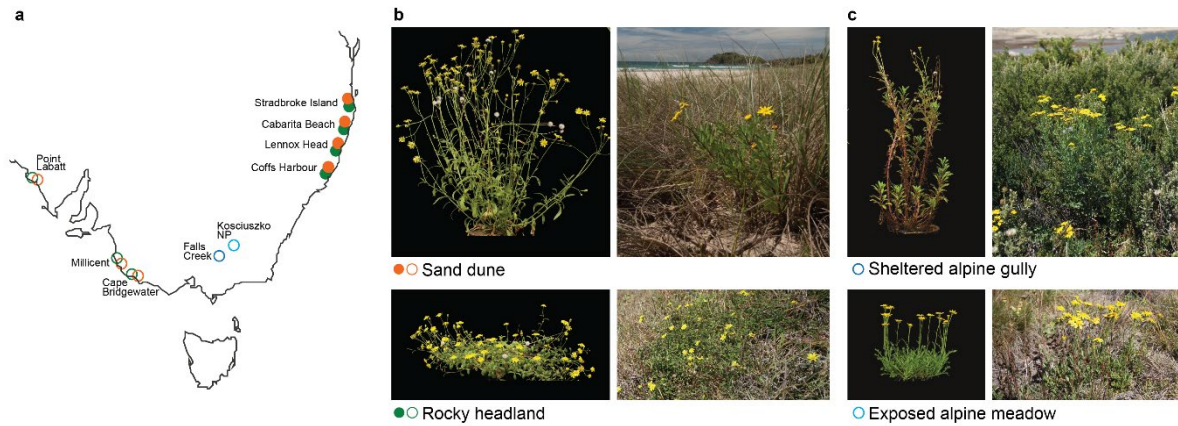

899

900 **Fig. 1. Sample locations and growth habit differences between adjacent *Senecio lautus***  
901 **populations. a,** Map of Australia showing locations of the 16 populations used in this study. The  
902 seven coastal localities have a Dune (orange) and Headland (green) population occurring adjacent to  
903 each other. The populations are split into two monophyletic clades (35), the eastern clade (closed  
904 circles) and the south-eastern clade (open circles). **b,** *Senecio lautus* native to the sand dunes have  
905 an erect growth habit and *S. lautus* native to the rocky headlands have a prostrate growth habit. **c,**  
906 Alpine populations of *S. lautus* include a sheltered alpine gully and an exposed alpine meadow,  
907 containing individuals with an erect and prostrate growth habit, respectively.

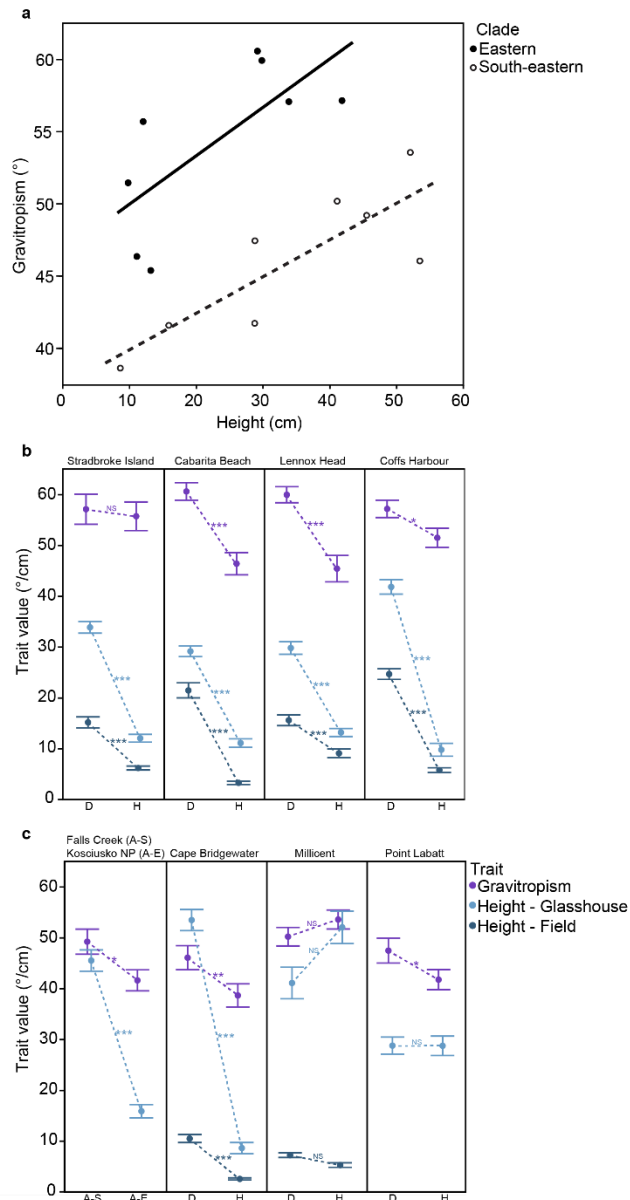

908  
 909  
 910  
 911  
 912  
 913  
 914  
 915  
 916  
 917

**Fig. 2. Gravitropism and height variation across 16 *Senecio lautus* populations.** **a**, The correlation between gravitropism and height across *S. lautus* populations split into their monophyletic clades – see Fig. 1 for details. Each point in the graph represents a population mean where height was measured in the glasshouse and gravitropism was measured 24 hours after a 90° rotation. **b,c**, Divergence in gravitropism (°), height (cm) in the glasshouse and height in the field between adjacent *S. lautus* populations (D = Dune, H = Headland, A-S=Alpine Sheltered and A-E = Alpine Exposed). **b**, eastern clade and **c**, south-eastern clade. Height in the field for Falls Creek, Kosciuszko NP and Point Labatt were not measured. Data are mean ± SE; one tailed Student's t-test (Table S6), \*P ≤ 0.05, \*\*P ≤ 0.01, \*\*\*P ≤ 0.001, NS not significant.

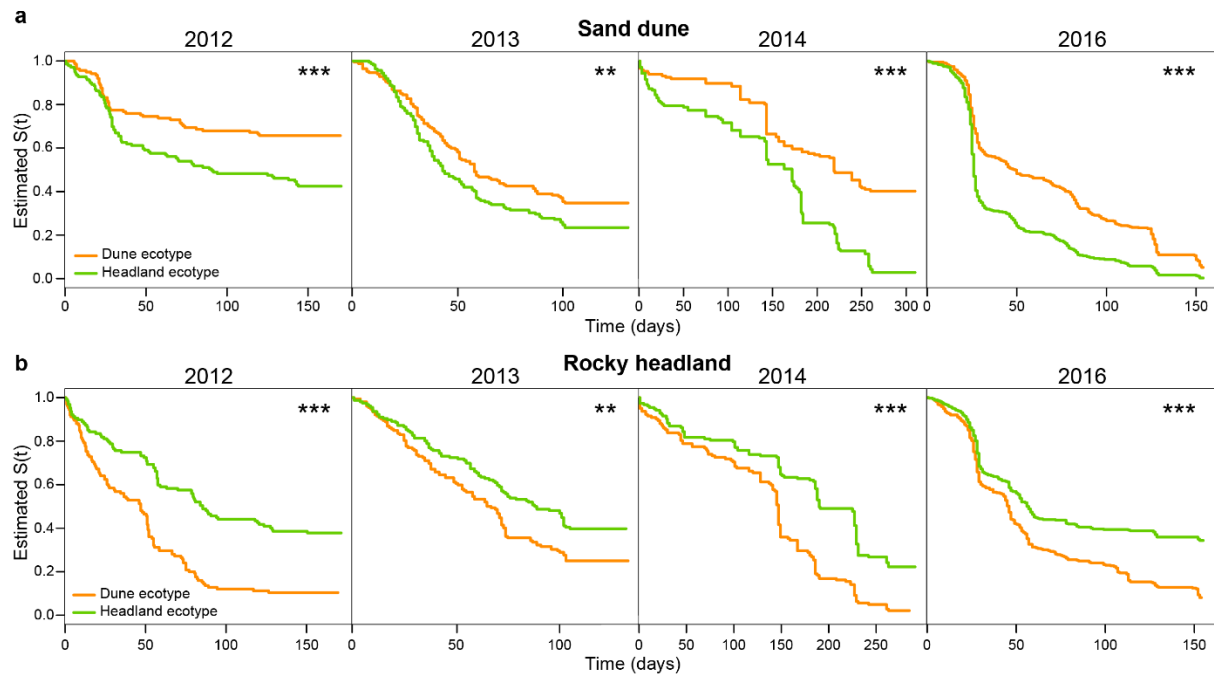

918  
919  
920  
921  
922  
923  
924

**Fig. 3. Parental survival curves in the height (2016) and gravitropism (2012-2014) adaptation experiments at the sand dune and rocky headland at Lennox Head. a,b**, Survival (Estimated  $S(t)$ ) over the length of the field experiments is shown for the Lennox Head Dune population (orange) and the Lennox Head Headland population (green) for four independent field selection experiments in the **a**, sand dune and **b**, rocky headland. Asterisks indicate a significant difference in mortality risk between the Dune and Headland ecotypes (\*\* $P \leq 0.01$ , \*\*\* $P \leq 0.001$ ).



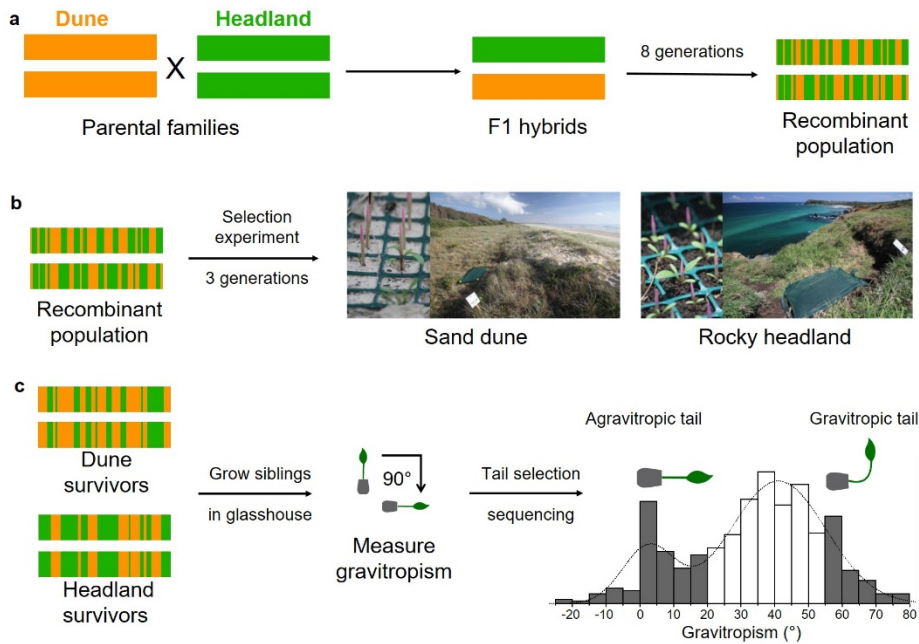

925  
926  
927  
928  
929  
930  
931  
932  
933  
934  
935  
936  
937  
938  
939

**Fig. 4. The creation of the recombinant hybrid generation, the design of the gravitropism adaptation experiments and sequencing of the tails of the gravitropic distribution.** **a**, 23 parental Dune and 22 parental Headland individuals from Lennox Head were crossed randomly and with equal contribution for eight generations. **b**, Seeds from this F8 recombinant population were glued to toothpicks and transplanted into the sand dune and rocky headland at Lennox Head. Among-family based selection occurred for three generations (F8, F9 and F10), where full-siblings from the fittest families were grown in the glasshouse and crossed amongst their respective genetic lines (A, B and C) and their environment (Dune survivors or Headland survivors). An inbred control was kept in the glasshouse and underwent the same crossing scheme but free from viability selection. **c**, Gravitropism was measured in the F11 recombinant population by re-orientating the plant by 90°. Here, agravitropic plants are define as individuals with gravitropic angles <math><20^\circ</math>, while gravitropic plants have gravitropic angles >math>>56^\circ</math> as they reorient their growth and subsequently grow upright. Individuals in the tails of the gravitropism distribution were sequenced on four lanes of the Illumina HiSeq 4000 platform.

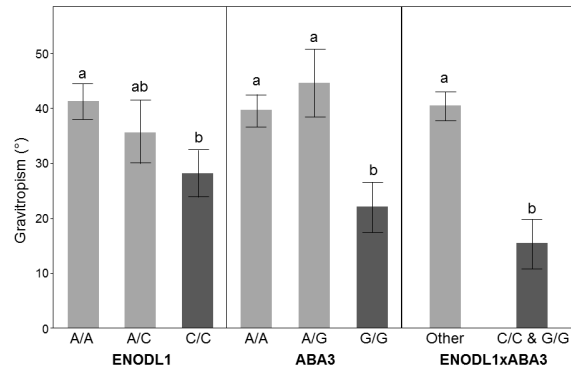

940  
941  
942  
943  
944

**Fig. 5. Association between *ENODL1* and *ABA3* alleles and gravitropism in *Senecio lautus*.** The average gravitropism angle is shown for each allelic combination, independently and when the agravitropic alleles (dark grey) are combined. Different letters denote significant differences between genotypes at a significance level of  $\alpha = 0.05$ .

945 **Table 1. General linear model for the effect of dam and sire on gravitropism (°) after a**  
 946 **field selection experiment on a recombinant hybrid Dune and Headland population.**  
 947 Field selection experiments were performed on F8, F9 and F10 recombinant hybrid  
 948 generations to achieve three rounds of selection in the sand dune and rocky headland at  
 949 Lennox Head (see Fig. 4 for the experimental design). Dam and sire fitness are the F10  
 950 family fitness values for the individuals that were crossed to create the F11 offspring where  
 951 gravitropism was measured. Intrinsic viability is the number of days until death of the F11  
 952 generation in the controlled temperature room. This experiment was conducted three times  
 953 (temporal block) with three independent genetic lines.

| Source                     | Dune |         |         |                  | Headland |         |         |              |
|----------------------------|------|---------|---------|------------------|----------|---------|---------|--------------|
|                            | DF   | SS      | F-Ratio | P-value          | DF       | SS      | F-Ratio | P-value      |
| <b>Dam family fitness</b>  | 6    | 8515.77 | 4.779   | <b>&lt;0.001</b> | 6        | 1884.31 | 0.701   | 0.650        |
| <b>Sire family fitness</b> | 6    | 1806.62 | 1.014   | 0.424            | 5        | 2315.36 | 1.033   | 0.405        |
| <b>Intrinsic viability</b> | 1    | 260.85  | 0.878   | 0.352            | 1        | 5209.38 | 11.624  | <b>0.001</b> |
| <b>Genetic lines</b>       | 3    | 1135.49 | 1.275   | 0.290            | 3        | 3357.19 | 2.497   | 0.067        |
| <b>Temporal block</b>      | 2    | 193.14  | 0.325   | 0.724            | 2        | 2234.96 | 2.494   | 0.090        |

954 DF, degrees of freedom; SS, sum of squares.

955 **Table 2. General linear model for the effect of *ENODL1* and *ABA3* alleles on hybrid**  
956 **sterility.** The genotypes of the F12's were predicted based on F11 parental genotypes with  
957 ambiguous genotypes removed. *ENODL1* is the allele counts for the *ENODL1* C allele in the  
958 F12's, while *ABA3* is the allele counts for the *ABA3* G allele. *ENODL1* x *ABA3* is the effect of  
959 all observed allelic combinations between these two gravitropism candidate loci and the  
960 percentage of failed crosses.  
961

| Source                      | DF | SS     | F-Ratio | P-value      |
|-----------------------------|----|--------|---------|--------------|
| <i>ENODL1</i>               | 1  | 6.51   | 0.078   | 0.791        |
| <i>ABA3</i>                 | 1  | 925.52 | 11.076  | <b>0.021</b> |
| <i>ENODL1</i> x <i>ABA3</i> | 1  | 9.77   | 0.117   | 0.746        |

962 DF, degrees of freedom; SS, sum of squares.
